# Supplementary material for: Reliability and Feasibility of the Self-Administered ISTH-Bleeding Assessment Tool
Source: PubMed Central journal article supplement (PMC6884422; doi:10.1055/s-0039-3400483), 2019-11-29

# Supplementary material

## Supplement 1. Inclusion and exclusion criteria for “Thrombocytopeny in the Netherlands” (TiN) study.

The following patients were eligible to participate in the TiN study:

1. Patients with a previously identified congenital platelet defect (CPD).
2. Patients suspected for a CPD based on previous abnormal platelet counts, light transmission aggregometry (LTA) results, or platelet ADP content.
3. Patients suspected for a CPD based on a predominantly mucocutaneous bleeding tendency compatible with a CPD, in whom other known causes of bleeding were excluded, and in whom previous LTA results or platelet ADP content were normal.
4. Patients suspected for a CPD based on a predominantly mucocutaneous bleeding tendency compatible with a CPD, in whom other known causes of bleeding were excluded, newly referred for platelet function testing.

Exclusion criteria were use of antiplatelet drugs that could not be stopped prior to inclusion, a known acquired platelet disorder, von Willebrand disease, hemophilia or another disorder of secondary hemostasis or fibrinolysis, and inability to give informed consent.

## Supplement 2: Receiver operator characteristic (ROC) curves International Society for Thrombosis and Hemostasis-bleeding assessment tool (ISTH-BAT) and self-administered ISTH-BAT (self-BAT).

| Coordinates of ROC curve for men |             |               |             |
|----------------------------------|-------------|---------------|-------------|
| Positive if $\geq$ to            | Sensitivity | 1-Specificity | Specificity |
| -1.00                            | 1.000       | 1.000         | 0           |
| 1.00                             | 1.000       | 0.818         | 0.182       |
| 2.50                             | 1.000       | 0.545         | 0.455       |
| 3.50                             | 0.960       | 0.455         | 0.545       |
| 4.50                             | 0.920       | 0.182         | 0.818       |
| 5.50                             | 0.880       | 0.091         | 0.909       |
| 6.50                             | 0.680       | 0.091         | 0.909       |
| 8.00                             | 0.560       | 0.091         | 0.909       |
| 9.50                             | 0.560       | 0.000         | 1           |
| 11.00                            | 0.480       | 0.000         | 1           |
| 13.00                            | 0.440       | 0.000         | 1           |
| 14.50                            | 0.360       | 0.000         | 1           |
| 15.50                            | 0.240       | 0.000         | 1           |
| 16.50                            | 0.200       | 0.000         | 1           |
| 17.50                            | 0.160       | 0.000         | 1           |
| 19.50                            | 0.120       | 0.000         | 1           |
| 21.50                            | 0.080       | 0.000         | 1           |
| 24.00                            | 0.040       | 0.000         | 1           |
| 27.00                            | 0.000       | 0.000         | 1           |

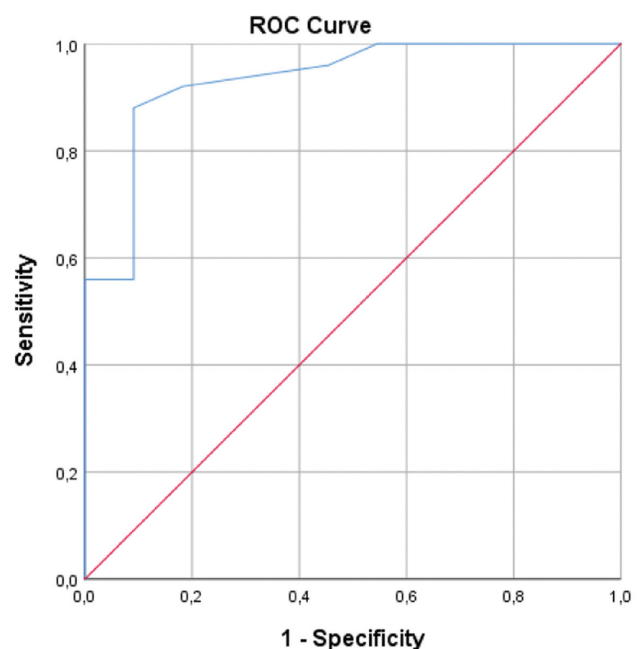

| Coordinates of ROC curve for women |             |               |             |
|------------------------------------|-------------|---------------|-------------|
| Positive if $\geq$ to              | Sensitivity | 1-Specificity | Specificity |
| 1.00                               | 1.000       | 1.000         | 0           |
| 2.50                               | 1.000       | 0.813         | 0.188       |
| 3.50                               | 1.000       | 0.750         | 0.250       |
| 4.50                               | 0.981       | 0.688         | 0.313       |
| 5.50                               | 0.971       | 0.563         | 0.438       |
| 6.50                               | 0.942       | 0.500         | 0.500       |
| 7.50                               | 0.875       | 0.375         | 0.625       |
| 8.50                               | 0.837       | 0.313         | 0.688       |
| 9.50                               | 0.760       | 0.250         | 0.750       |
| 10.50                              | 0.731       | 0.125         | 0.875       |
| 11.50                              | 0.663       | 0.000         | 1           |
| 12.50                              | 0.587       | 0.000         | 1           |
| 13.50                              | 0.490       | 0.000         | 1           |
| 14.50                              | 0.385       | 0.000         | 1           |
| 15.50                              | 0.308       | 0.000         | 1           |
| 16.50                              | 0.231       | 0.000         | 1           |
| 17.50                              | 0.183       | 0.000         | 1           |
| 18.50                              | 0.154       | 0.000         | 1           |
| 19.50                              | 0.135       | 0.000         | 1           |
| 20.50                              | 0.106       | 0.000         | 1           |
| 21.50                              | 0.087       | 0.000         | 1           |
| 23.50                              | 0.067       | 0.000         | 1           |
| 26.50                              | 0.048       | 0.000         | 1           |
| 29.00                              | 0.029       | 0.000         | 1           |
| 30.50                              | 0.019       | 0.000         | 1           |
| 32.00                              | 0.010       | 0.000         | 1           |
| 34.00                              | 0.000       | 0.000         | 1           |

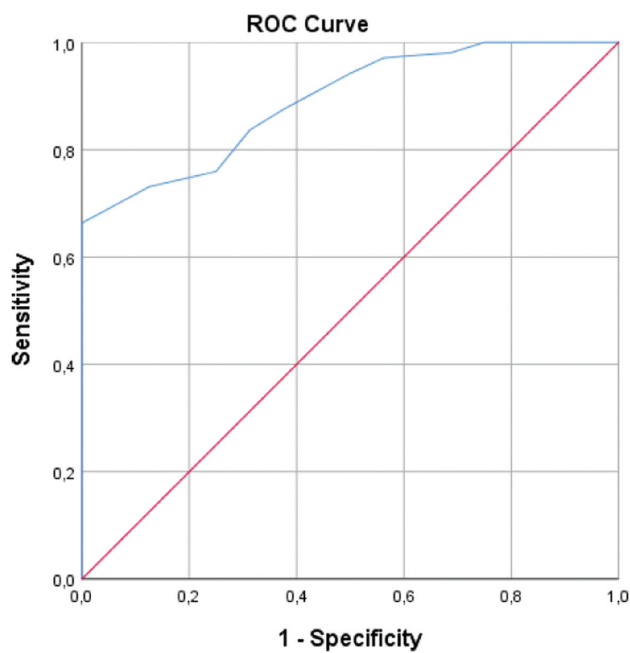

**Supplement 3. Scatter plot and crosstable of International Society for Thrombosis and Hemostasis-bleeding assessment tool (ISTH-BAT) domain score versus self-administered ISTH-BAT (self-BAT) domain score.**

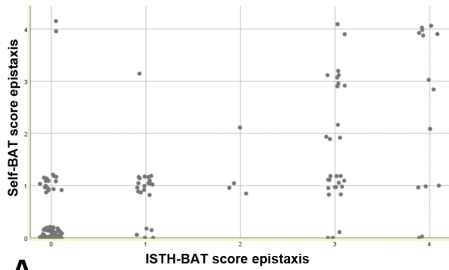

**A**

|                |   | Self-BAT score |    |   |    |    | Total |
|----------------|---|----------------|----|---|----|----|-------|
|                |   | 0              | 1  | 2 | 3  | 4  |       |
| ISTH-BAT score | 0 | 68             | 17 | 0 | 0  | 2  | 87    |
|                | 1 | 5              | 16 | 0 | 1  | 0  | 22    |
|                | 2 | 0              | 3  | 1 | 0  | 0  | 4     |
|                | 3 | 3              | 13 | 4 | 7  | 2  | 29    |
|                | 4 | 2              | 3  | 1 | 2  | 6  | 14    |
| Total          |   | 78             | 52 | 6 | 10 | 10 | 156   |

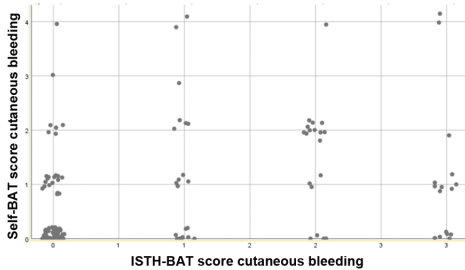

**B**

|                |       | Self-BAT score |    |    |    |   | Total |
|----------------|-------|----------------|----|----|----|---|-------|
|                |       | 0              | 1  | 2  | 3  | 4 |       |
| ISTH-BAT score | 0     | 74             | 16 | 5  | 1  | 1 | 97    |
|                | 1     | 11             | 5  | 4  | 1  | 2 | 23    |
|                | 2     | 5              | 3  | 11 | 0  | 1 | 20    |
|                | 3     | 6              | 7  | 1  | 0  | 2 | 16    |
|                | Total |                | 96 | 31 | 21 | 2 | 6     |

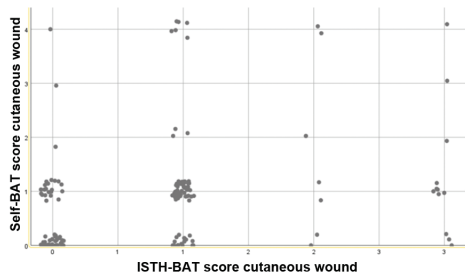

**C**

|                |       | Self-BAT score |    |    |   |   | Total |
|----------------|-------|----------------|----|----|---|---|-------|
|                |       | 0              | 1  | 2  | 3 | 4 |       |
| ISTH-BAT score | 0     | 38             | 20 | 1  | 1 | 1 | 61    |
|                | 1     | 18             | 49 | 3  | 0 | 6 | 76    |
|                | 2     | 2              | 2  | 1  | 0 | 2 | 7     |
|                | 3     | 3              | 6  | 1  | 1 | 1 | 12    |
|                | Total |                | 61 | 77 | 6 | 2 | 10    |

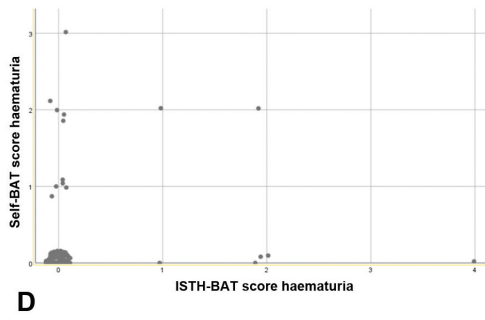

D

|                |       | Self-BAT score |     |   |   | Total |     |
|----------------|-------|----------------|-----|---|---|-------|-----|
|                |       | 0              | 1   | 2 | 3 |       |     |
| ISTH-BAT score | 0     | 0              | 139 | 5 | 4 | 1     | 149 |
|                | 1     | 1              | 1   | 0 | 1 | 0     | 2   |
|                | 2     | 3              | 0   | 0 | 1 | 0     | 4   |
|                | 4     | 1              | 0   | 0 | 0 | 0     | 1   |
|                | Total | 14             | 5   | 6 | 1 | 4     | 156 |

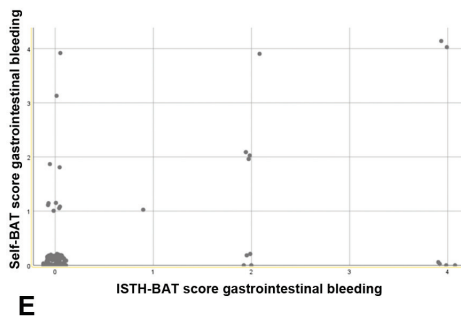

E

|                |       | Self-BAT score |     |   |   |   | Total |     |
|----------------|-------|----------------|-----|---|---|---|-------|-----|
|                |       | 0              | 1   | 2 | 3 | 4 |       |     |
| ISTH-BAT score | 0     | 0              | 131 | 6 | 2 | 1 | 1     | 141 |
|                | 1     | 0              | 1   | 0 | 0 | 0 | 0     | 1   |
|                | 2     | 4              | 0   | 0 | 3 | 0 | 1     | 8   |
|                | 4     | 4              | 0   | 0 | 0 | 2 | 6     |     |
|                | Total | 139            | 7   | 5 | 1 | 4 | 156   |     |

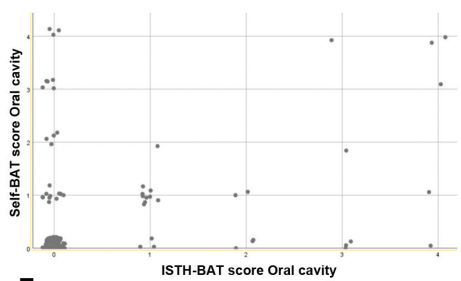

F

|                |     | Self-BAT score |     |    |   |     | Total |     |
|----------------|-----|----------------|-----|----|---|-----|-------|-----|
|                |     | 0              | 1   | 2  | 3 | 4   |       |     |
| ISTH-BAT score | 0   | 0              | 105 | 11 | 4 | 5   | 3     | 128 |
|                | 1   | 3              | 9   | 1  | 0 | 0   | 0     | 13  |
|                | 2   | 3              | 2   | 0  | 0 | 0   | 0     | 5   |
|                | 3   | 3              | 0   | 1  | 0 | 1   | 5     |     |
|                | 4   | 1              | 1   | 0  | 1 | 2   | 5     |     |
| Total          | 115 | 23             | 6   | 6  | 6 | 156 |       |     |

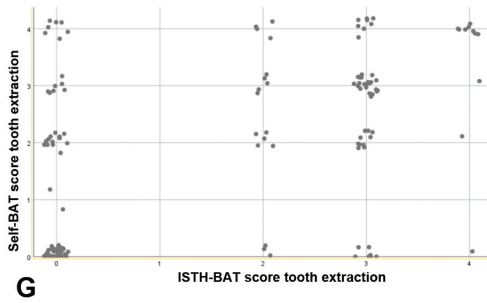

**Tooth extraction**

|       | Self-BAT score |    |    |    |    | Total |    |
|-------|----------------|----|----|----|----|-------|----|
|       | 0              | 1  | 2  | 3  | 4  |       |    |
| ISTH- | 0              | 49 | 2  | 14 | 7  | 7     | 79 |
| BAT   | 2              | 3  | 0  | 5  | 5  | 4     | 17 |
| score | 3              | 7  | 0  | 10 | 24 | 8     | 49 |
|       | 4              | 1  | 0  | 1  | 1  | 8     | 11 |
| Total | 60             | 2  | 30 | 37 | 27 | 156   |    |

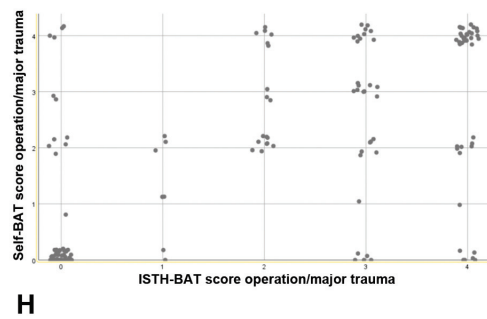

**Operation/major trauma**

|       | Self-BAT score |    |    |    |    | Total |    |
|-------|----------------|----|----|----|----|-------|----|
|       | 0              | 1  | 2  | 3  | 4  |       |    |
| ISTH- | 0              | 47 | 1  | 5  | 2  | 4     | 59 |
| BAT   | 1              | 2  | 2  | 3  | 0  | 0     | 7  |
| score | 2              | 0  | 0  | 9  | 3  | 6     | 18 |
|       | 3              | 5  | 1  | 6  | 9  | 10    | 31 |
|       | 4              | 6  | 1  | 7  | 0  | 27    | 41 |
| Total | 60             | 5  | 30 | 14 | 47 | 156   |    |

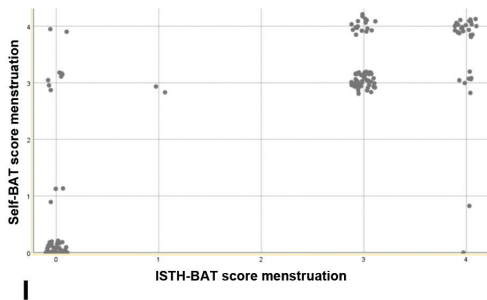

**Menstruation**

|       | Self-BAT score |    |    |    | Total |    |
|-------|----------------|----|----|----|-------|----|
|       | 0              | 1  | 3  | 4  |       |    |
| ISTH- | 0              | 43 | 3  | 7  | 2     | 55 |
| BAT   | 1              | 0  | 0  | 2  | 0     | 2  |
| score | 3              | 0  | 0  | 48 | 17    | 65 |
|       | 4              | 1  | 1  | 7  | 25    | 34 |
| Total | 44             | 4  | 64 | 44 | 156   |    |

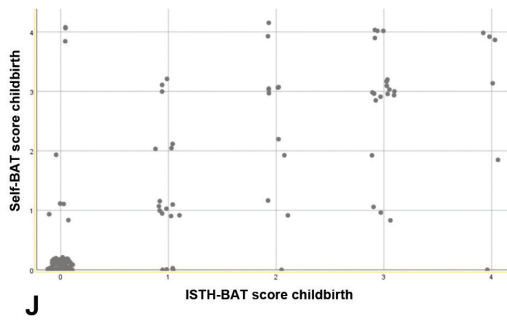

J

|                       |   | Self-BAT score |    |   |    |    | Total |
|-----------------------|---|----------------|----|---|----|----|-------|
|                       |   | 0              | 1  | 2 | 3  | 4  |       |
| ISTH-<br>BAT<br>score | 0 | 93             | 4  | 1 | 0  | 3  | 101   |
|                       | 1 | 4              | 8  | 3 | 3  | 0  | 18    |
|                       | 2 | 1              | 2  | 2 | 5  | 2  | 12    |
|                       | 3 | 0              | 3  | 1 | 11 | 4  | 19    |
|                       | 4 | 1              | 0  | 1 | 1  | 3  | 6     |
| Total                 |   | 99             | 17 | 8 | 20 | 12 | 156   |

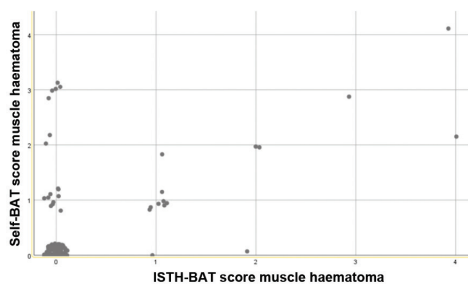

K

|                        |   | Self-BAT score |    |   |   |   | Total |
|------------------------|---|----------------|----|---|---|---|-------|
|                        |   | 0              | 1  | 2 | 3 | 4 |       |
| ISTH-<br>-BAT<br>score | 0 | 124            | 10 | 2 | 5 | 0 | 141   |
|                        | 1 | 1              | 7  | 1 | 0 | 0 | 9     |
|                        | 2 | 1              | 0  | 2 | 0 | 0 | 3     |
|                        | 3 | 0              | 0  | 0 | 1 | 0 | 1     |
|                        | 4 | 0              | 0  | 1 | 0 | 1 | 2     |
| Total                  |   | 126            | 17 | 6 | 6 | 1 | 156   |

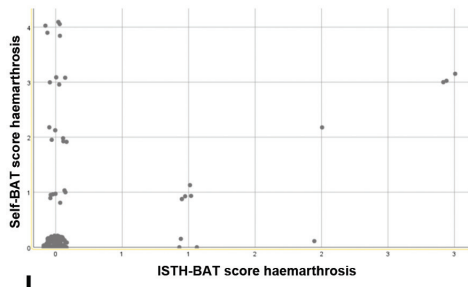

L

|                       |       | Self-BAT score |     |    |   |   | Total |
|-----------------------|-------|----------------|-----|----|---|---|-------|
|                       |       | 0              | 1   | 2  | 3 | 4 |       |
| ISTH-<br>BAT<br>score | 0     | 122            | 7   | 6  | 4 | 5 | 144   |
|                       | 1     | 3              | 4   | 0  | 0 | 0 | 7     |
|                       | 2     | 1              | 0   | 1  | 0 | 0 | 2     |
|                       | 3     | 0              | 0   | 0  | 3 | 0 | 3     |
|                       | Total |                | 126 | 11 | 7 | 7 | 5     |

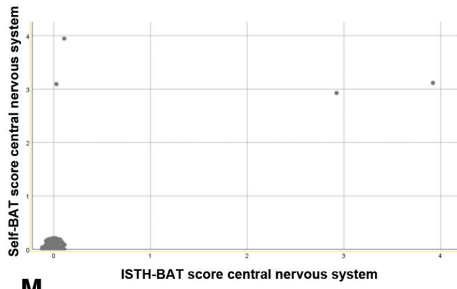

**M**

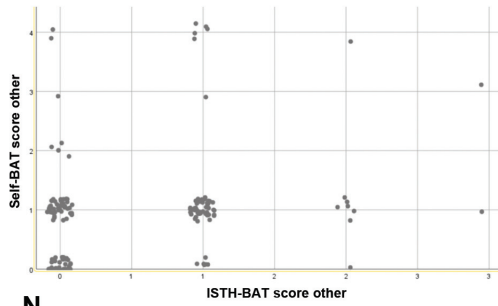

**N**

**Central nervous system**

|       | Self-BAT score        |             |               | Total |
|-------|-----------------------|-------------|---------------|-------|
|       | 0                     | 3           | 4             |       |
|       | ISTH-<br>BAT<br>score | 0<br>3<br>4 | 152<br>0<br>0 |       |
| Total | 152                   | 3           | 1             | 156   |

**Other**

|                       | Self-BAT score   |                   |                    |                  |                  | Total            |
|-----------------------|------------------|-------------------|--------------------|------------------|------------------|------------------|
|                       | 0                | 1                 | 2                  | 3                | 4                |                  |
| ISTH-<br>BAT<br>score | 0<br>1<br>2<br>3 | 40<br>6<br>1<br>0 | 43<br>44<br>6<br>1 | 4<br>0<br>0<br>0 | 1<br>1<br>0<br>1 | 2<br>5<br>1<br>0 |
| Total                 | 47               | 94                | 4                  | 3                | 8                | 156              |

**Supplement 4. (A) Effect of age, (B) sex, and (C) time between self-administered International Society for Thrombosis and Hemostasis (ISTH)-bleeding assessment tool (self-BAT) and ISTH-BAT assessment on the difference between self-BAT and ISTH-BAT score.**

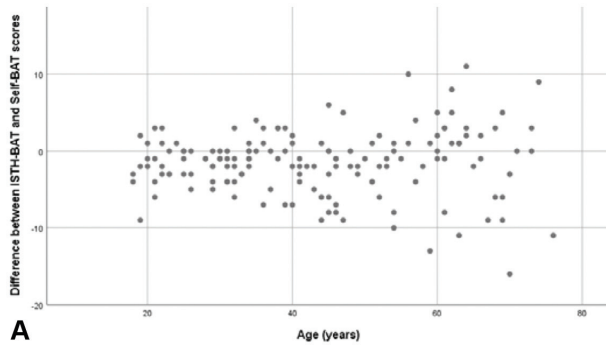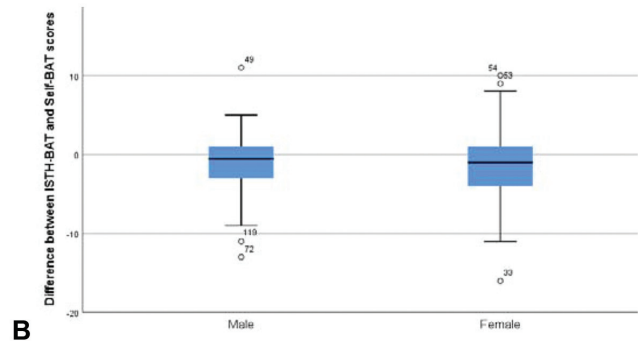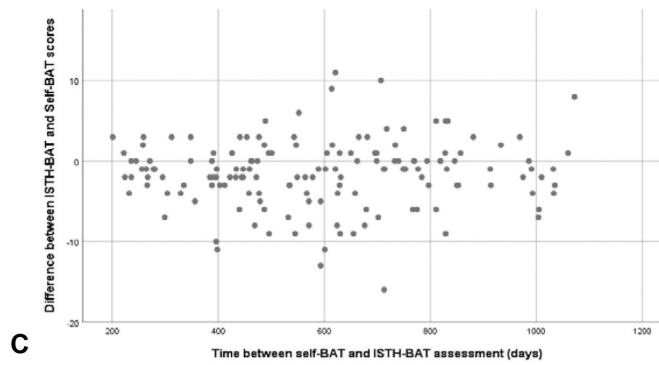

Supplement: 10-1055-s-0039-3400483-s190050oa.pdf [file 10-1055-s-0039-3400483-s190050oa.pdf]
